# Supplementary material for: A clinically translatable hyperspectral endoscopy (HySE) system for imaging the gastrointestinal tract
Source: PubMed Central journal article supplement (PMC6478902; doi:10.1038/s41467-019-09484-4), 2019-04-23
Supplement: 41467_2019_9484_MOESM1_ESM.pdf [file 41467_2019_9484_MOESM1_ESM.pdf]

# Supplementary Information for

A clinically translatable hyperspectral endoscopy (HySE) system for  
imaging the gastrointestinal tract

Yoon et al.

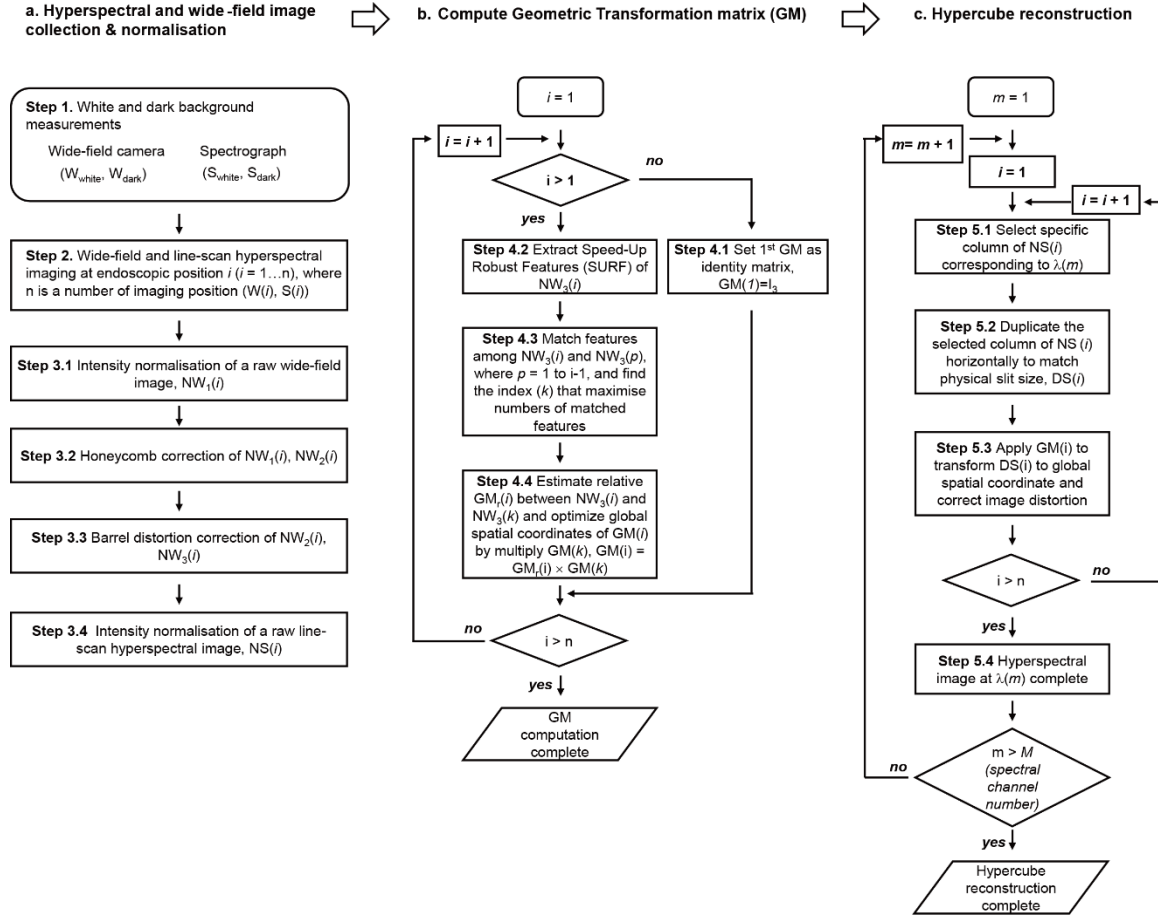

**Supplementary Figure. 1. A schematic overview of the workflow of hyperspectral endoscopic imaging.** **a** Hyperspectral and wide-field image measurement and normalisation. **b** Wide-field image registration process for estimating geometric transformation matrices (GMs) of each wide-field image to retrieve information about imaging position and distortion required for hypercube reconstruction. **c** Hypercube reconstruction process by exploiting normalised spectral images and estimated GMs.

a

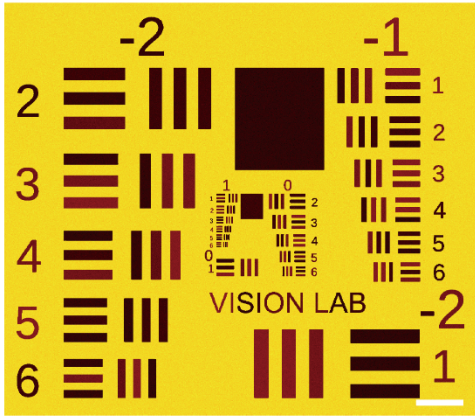

b

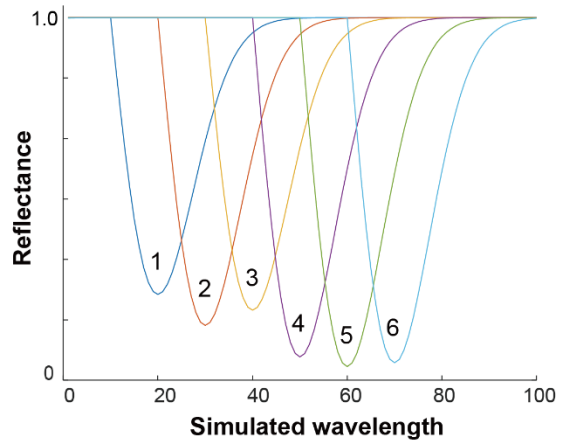

**Supplementary Figure. 2. *In silico* USAF 1951 test target used for simulation. a** 2D projection image of simulated hyperspectral USAF target along the wavelength. Scale bar = 200 pixels. **b** Six spectral features randomly assigned to each USAF target element.

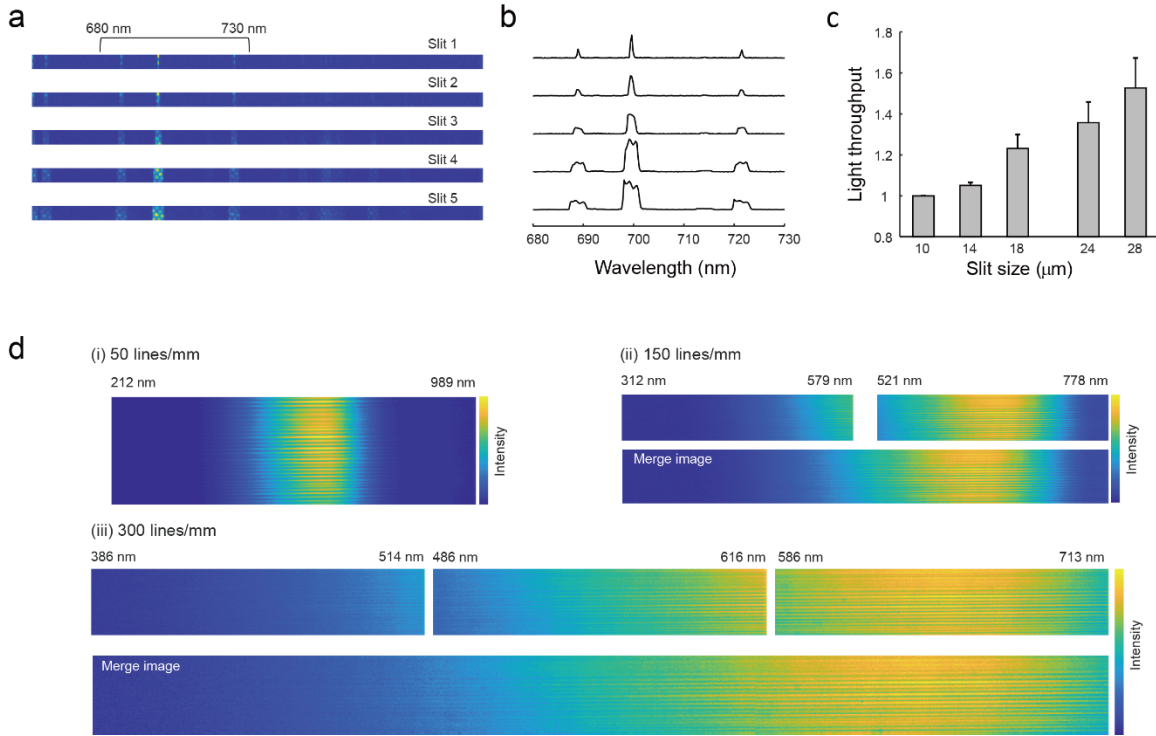

**Supplementary Figure. 3. Investigation of spectral resolution and bandwidth.** **a** Spectral images measured using five different slit sizes. **b** Line profiles of spectral images between spectral ranges of 680 to 830 nm. **c** Quantification of light throughput measured using five different slit sizes. Average light throughput measured using the 10  $\mu\text{m}$  slit was used as a reference. Error bars represent standard deviation. **d** Spectral bandwidth of a single spectral images measured using three different gratings. To obtain a spectral image over 300 nm, multiple spectral images were merged.

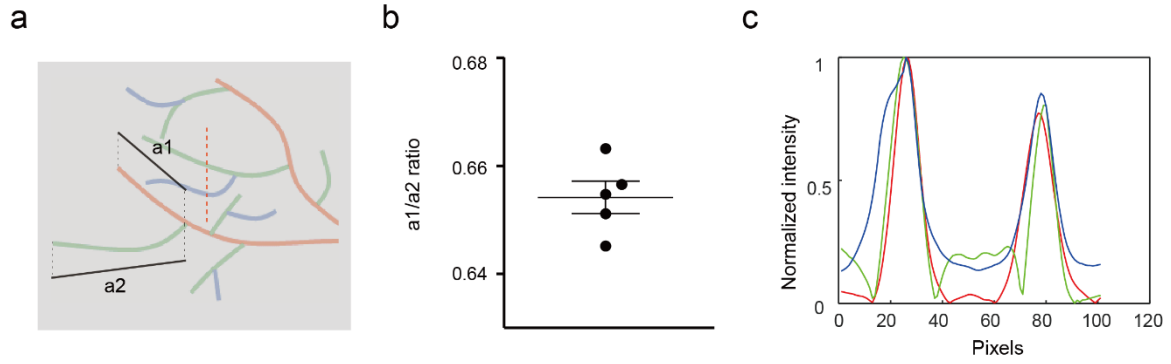

**Supplementary Figure. 4. Quantitative analysis of freehand imaging quality. a** A vascular tree phantom measured by free-hand hyperspectral imaging. **b** a1 and a2 ratio was quantified shown in a. Centre horizontal line indicates mean value and error bars represent standard deviation. **c** Line profile of the dashed red line shown in a.

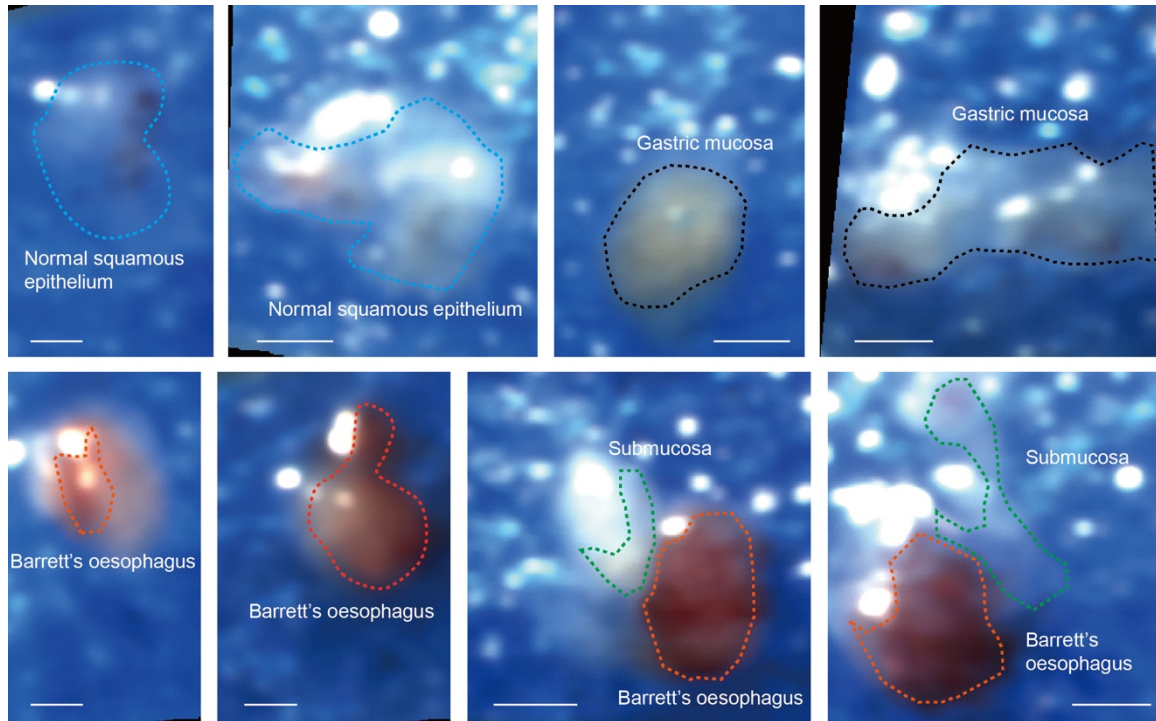

**Supplementary Figure. 5. Synthetic RGB images of *ex vivo* human tissues from patients.**

Dashed line indicates boundary of each tissue type. Scale bars are 1 mm.

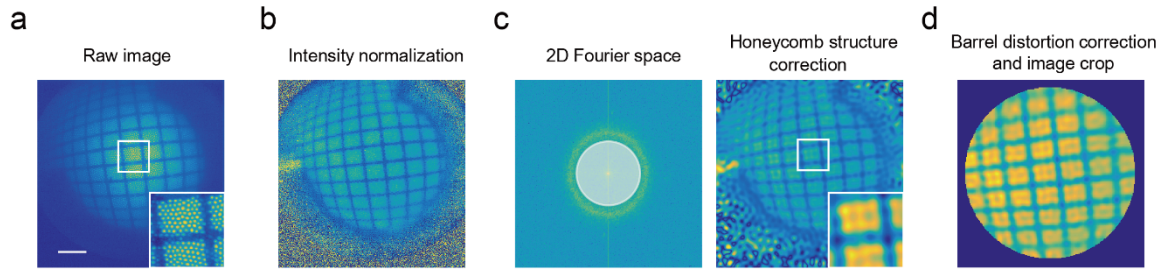

**Supplementary Figure. 6. Pre-processing steps for endoscopic image calibration. a** Raw endoscopic image. Inset shows magnified image of the white dashed square. Scale bar = 1 mm. **b** Intensity normalized image following correction with white and dark background images. **c** Honeycomb structure correction via low-pass filtering in 2D Fourier space. 2D Fourier transformed image (Left). Grey circle indicates the size of low-pass filtering mask. Image without honeycomb structure obtained by inverse Fourier transformation of filtered 2D Fourier information (Right). Inset shows magnified image of the white dashed square. **d** Image after all pre-processing, including barrel distortion correction and image crop.

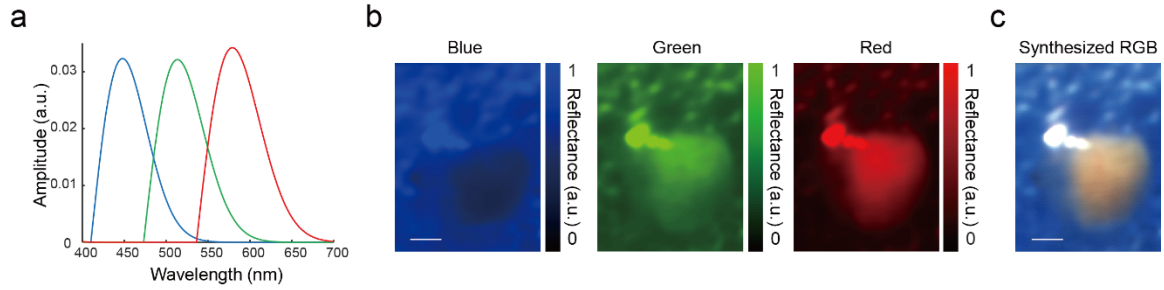

**Supplementary Figure. 7. Generation of synthetic RGB image from the hyperspectral image.**

**a** Spectral profile of applied red, green, and blue filters. **b** Blue, green, and red images of ex vivo human tissue generated by multiplying the corresponding colour filter in **a** by the reconstructed hypercube. **c** Synthesized RGB image of tissue. Scale bars = 1 mm.



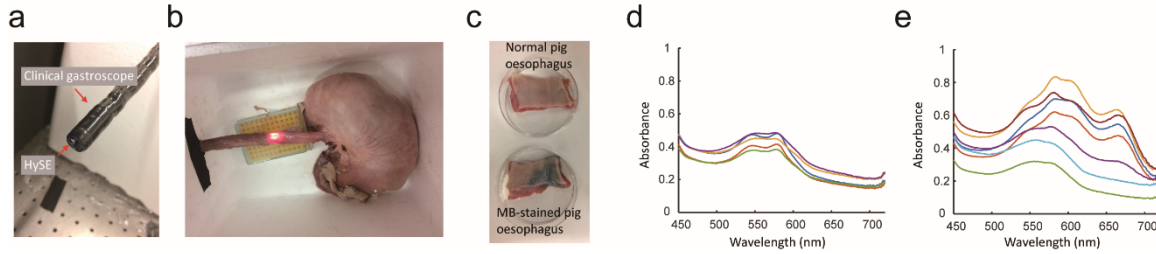

**Supplementary Figure. 8. Experiment setup for hyperspectral imaging of an intact *ex vivo* pig oesophagus model.** **a** Photography of endoscopy setup. The HySE was inserted via an accessory channel of the clinical gastroscope. **b** Photography of the inflated pig oesophagus and stomach. Illumination at the distal end of the HySE using the internal illumination method can be seen as a bright area in the oesophagus. **c** Photography of the dissected pig oesophagus tissue with and without methylene-blue (MB) staining. Lumen of the pig oesophagus was exposed and measured using a spectrometer. **d, e** Ground-truth absorbance of normal and MB-stained pig oesophagus tissue was measured via the spectrometer at multiple random locations in the tissue.

Supplementary Table 1. Summary of specifications of HySE compared to nearest previous reports.

|                              | HySE                                                      |                         |                         | Previous works              |                   |
|------------------------------|-----------------------------------------------------------|-------------------------|-------------------------|-----------------------------|-------------------|
|                              | 50 lines/mm                                               | 150 lines/mm            | 300 lines/mm            | Ref 15                      | Ref 54            |
| Operation mode               | Spatial scanning                                          |                         |                         | Rotating multicolour filter | Snapshot          |
| Spectral resolution          | $\sim 2.85 \pm 0.39$ nm                                   | $\sim 1.10 \pm 0.01$ nm | $\sim 0.46 \pm 0.05$ nm | $\sim 15$ nm                | 4 to 10 nm        |
| Bandwidth or spectral ranges | 750 nm                                                    | 250 nm                  | 125 nm                  | 400 – 760 nm                | 450 – 650 nm      |
| Spectral channels            | Over 200 channels                                         |                         |                         | 18                          | 48                |
| Spatial resolution           | $119.46 \pm 11.58 \mu\text{m}$ @ working distance of 5 mm |                         |                         | N.A                         | 100 $\mu\text{m}$ |
| Image acquisition speed      | Without pixel binning: 20 fps (spectral imaging)          |                         |                         | 15 fps                      | 8 to 10 fps       |
|                              | 2 vertical pixels binning: 29 fps (spectral imaging)      |                         |                         |                             |                   |
|                              | Over 35 fps (wide-field imaging)                          |                         |                         |                             |                   |
